# Supplementary material for: Concise synthesis and biological activity evaluation of novel pyrazinyl–aryl urea derivatives against several cancer cell lines, which can especially induce T24 apoptotic and necroptotic cell death
Source: Royal Society of Chemistry journal article supplement (doi:10.1039/d1md00306b), 2021-11-11
Supplement: d1md00306b2.pdf [file d1md00306b2.pdf]

## Supplementary data

**Concise synthesis and biological activity evaluation of novel pyrazinyl-aryl urea derivatives against several cancer cell lines which especially can induce T24 apoptotic and necroptotic cell death**

Jia-Nian Chen<sup>1,\*</sup>, Chu-Ting Chen<sup>1</sup>, Yue-Zhen He<sup>1</sup>, Tai-Sheng Qin<sup>1</sup>, Li Cheng<sup>1</sup>, Ye-Xiang Sun, Kang-Jian Yang, Qi Chen, Chao Yang and Ying Wei

State Key Laboratory for Chemistry and Molecular Engineering of Medicinal Resources, Collaborative Innovation Center for Guangxi Ethnic Medicine, School of Chemistry and Pharmaceutical Sciences, Guangxi Normal University, Yucui Road 15, Guilin 541004, Guangxi, P.R. China

\*Corresponding author.

<sup>1</sup>These authors contributed equally to this work.

Correspondence: Jia-Nian Chen

State Key Laboratory for Chemistry and Molecular Engineering of Medicinal Resources, Collaborative Innovation Center for Guangxi Ethnic Medicine, School of Chemistry and Pharmaceutical Sciences, Guangxi Normal University, Yucui Road 15, Guilin 541004, Guangxi, P.R. China

Tel/Fax: +86-0773-2120958

Email: cjn288@mailbox.gxnu.edu.cn

ORCID: 0000-0002-5551-8240

## Additional file 2: Fig. S1–S8 and Table S1–S2

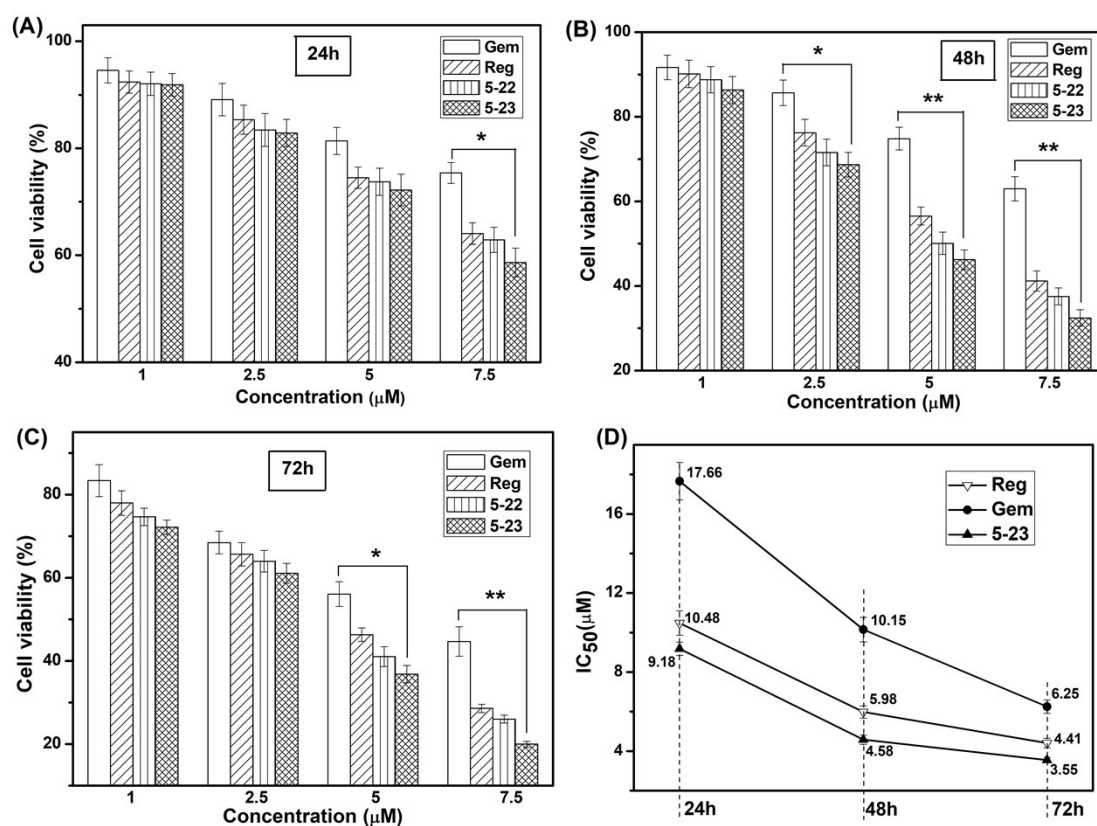

**Fig. S1** The inhibitory effects of pyrazinyl-aryl urea derivative **5-23** on T24 cell proliferation. T24 cells were treated with **5-23** (or positive reference drugs regorafenib and gemcitabine) for the indicated periods of time (24, 48, and 72 h), respectively, cell viability was then measured by the MTT assay (A–C). (D)  $\text{IC}_{50}$  values of **5-23**, Reg, and Gem at different incubation times. Results are presented as means  $\pm$  S.D. (standard deviation) of four independent experiments. \*  $p < 0.05$  and \*\*  $p < 0.01$ . Abbreviations: Gem, gemcitabine; Reg, regorafenib.

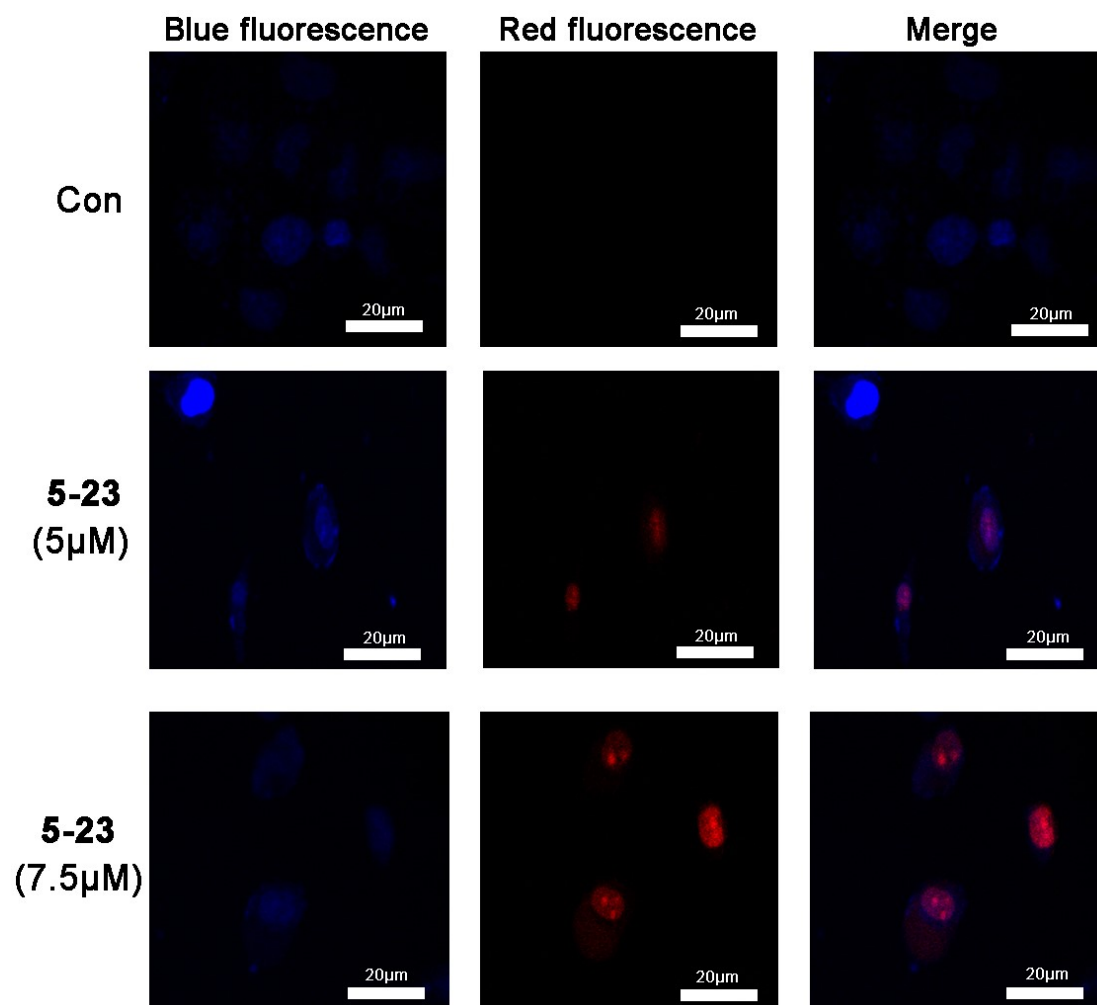

**Fig. S2** Induced apoptosis of T24 cells by compound **5-23**. After the co-incubation with **5-23** for 10 h, T24 cells were stained with Hoechst 33342 and propidium iodide (Hoe/PI). The experiment was repeated thrice, here only representative fluorescence microscopic images were shown.

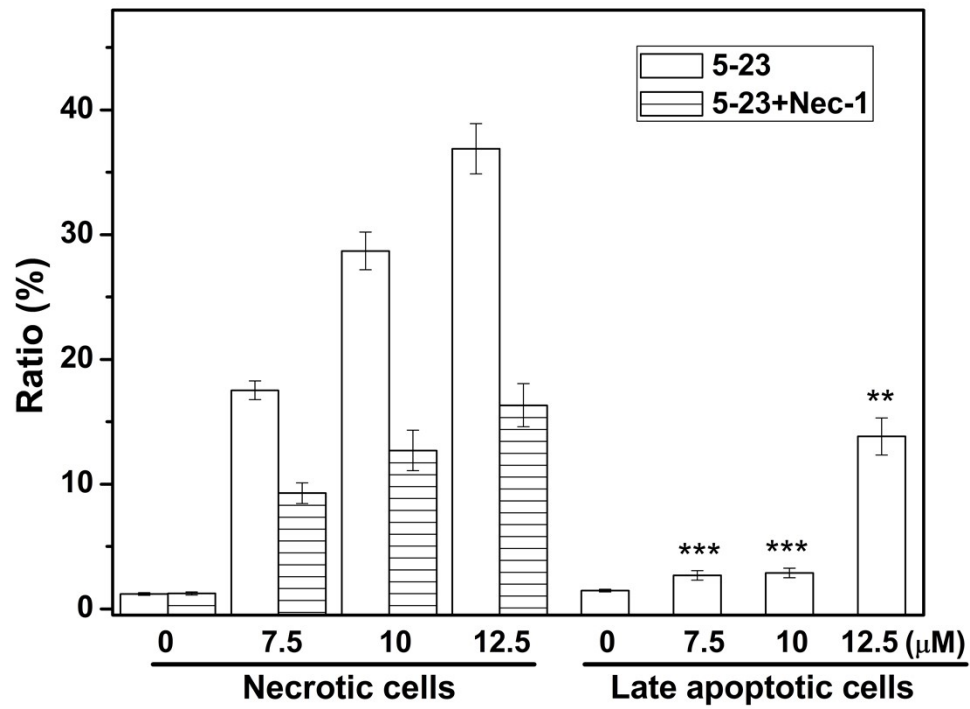

**Fig. S3** Changes in the ratios of necrotic and late apoptotic cells after the treatment with **5-23** in the absence or presence of Nec-1. \*\*  $p < 0.01$  and \*\*\*  $p < 0.001$  versus the ratios of necrotic cells at the same concentration of **5-23** (absence of Nec-1).

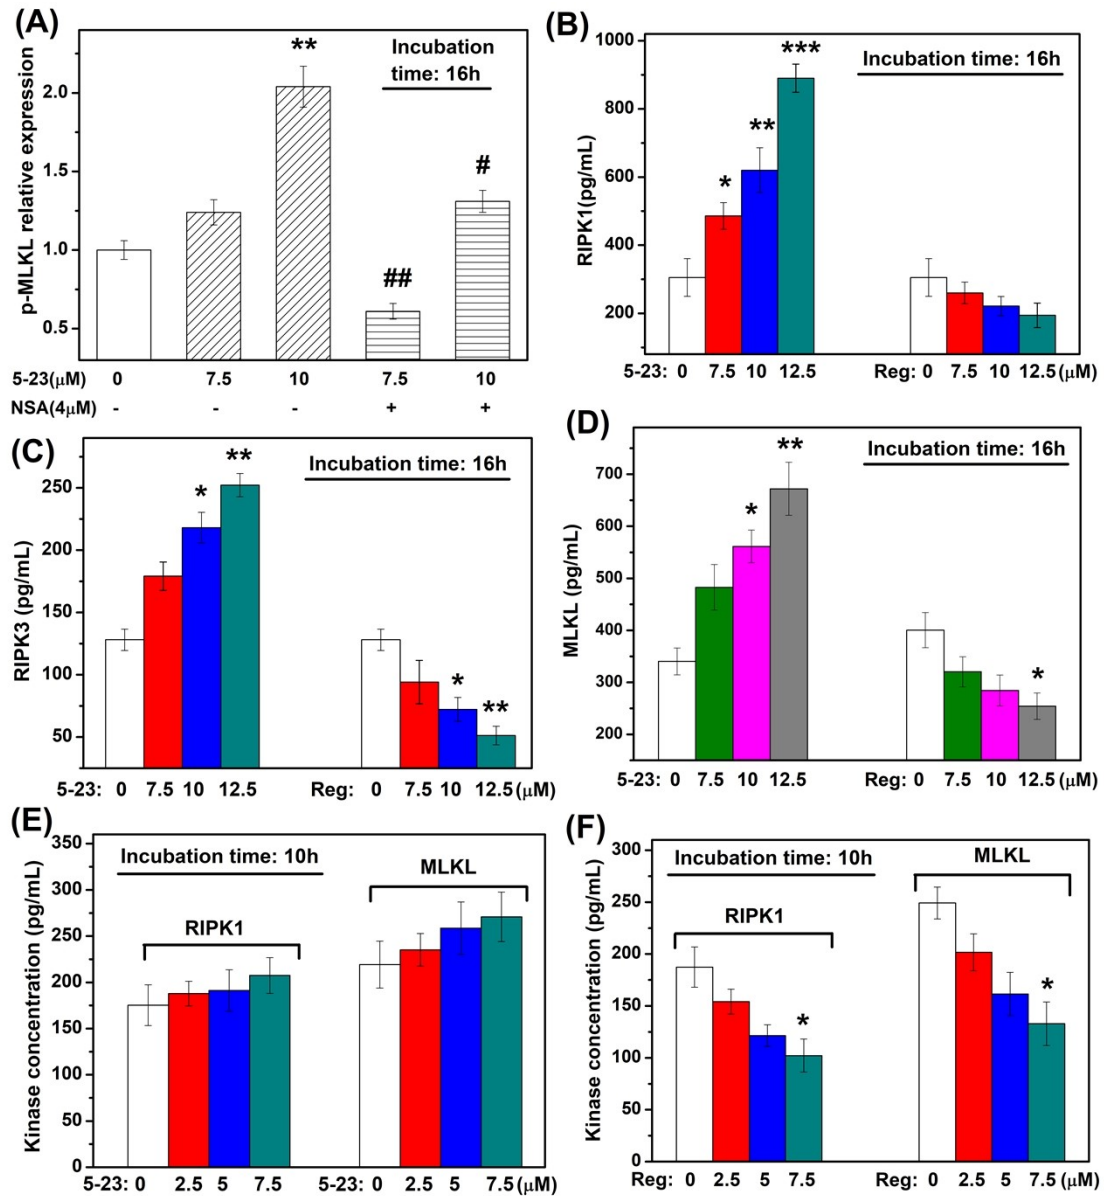

**Fig. S4** Intracellular RIPK1, RIPK3, MLKL, and p-MLKL expression and concentration analyses. (A) Expression level changes of p-MLKL after the treatment with **5-23** in the presence (or absence) of necrosulfonamide (NSA). (B–F) Intracellular RIPK1, RIPK3, and MLKL kinase concentration changes before and after the treatment with **5-23** (or Reg) by enzyme-linked immunosorbent assay (ELISA). \*  $p < 0.05$ , \*\*  $p < 0.01$ , and \*\*\*  $p < 0.001$  versus control (concentration: 0 μM). In figure (A), #  $p < 0.05$  and ##  $p < 0.01$  versus the groups treated only with the same concentration of **5-23** (without the addition of NSA).

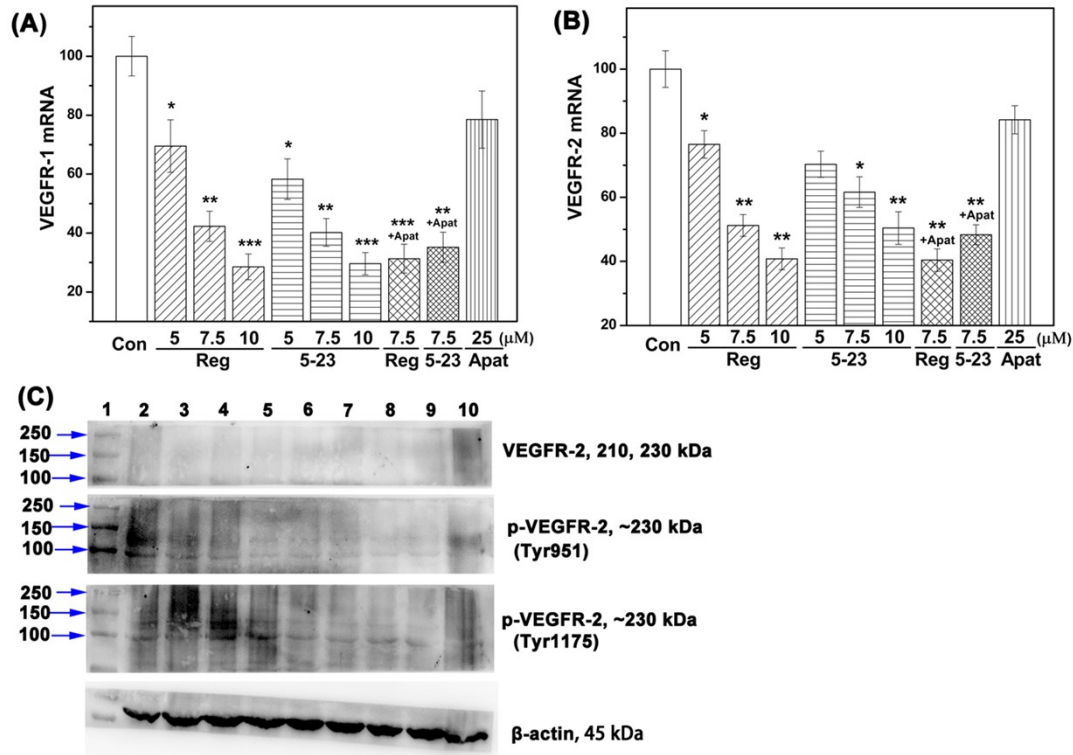

**Fig. S5** VEGFR-1 and -2 expressions after T24 cells were treated with **5-23**. Intracellular mRNA expression levels of VEGFR-1 (A) and VEGFR-2 (B) after the treatment with **5-23**. (C) Expressions of VEGFR-2 and p-VEGFR-2 by Western blotting analysis, while their bands were not detected. In Fig. A and B, relative values were normalized to GAPDH for RT-PCR. Each bar represents the mean  $\pm$  S.D. of three independent experiments. \*  $p < 0.05$ , \*\*  $p < 0.01$ , and \*\*\*  $p < 0.001$  versus control. Notes of Figure (C), lane 1: Marker; lane 2: Control; lane 3: regorafenib (7.5  $\mu$ M); lane 4: **5-23** (5  $\mu$ M); lane 5: **5-23** (7.5  $\mu$ M); lane 6: **5-23** (10  $\mu$ M); lane 7: **5-23** (7.5  $\mu$ M) plus apatinib (12.5  $\mu$ M); lane 8: **5-23** (7.5  $\mu$ M) plus apatinib (25  $\mu$ M); lane 9: **5-23** (10  $\mu$ M) plus apatinib (25  $\mu$ M); lane 10: apatinib (25  $\mu$ M). Incubation time: 16 h.

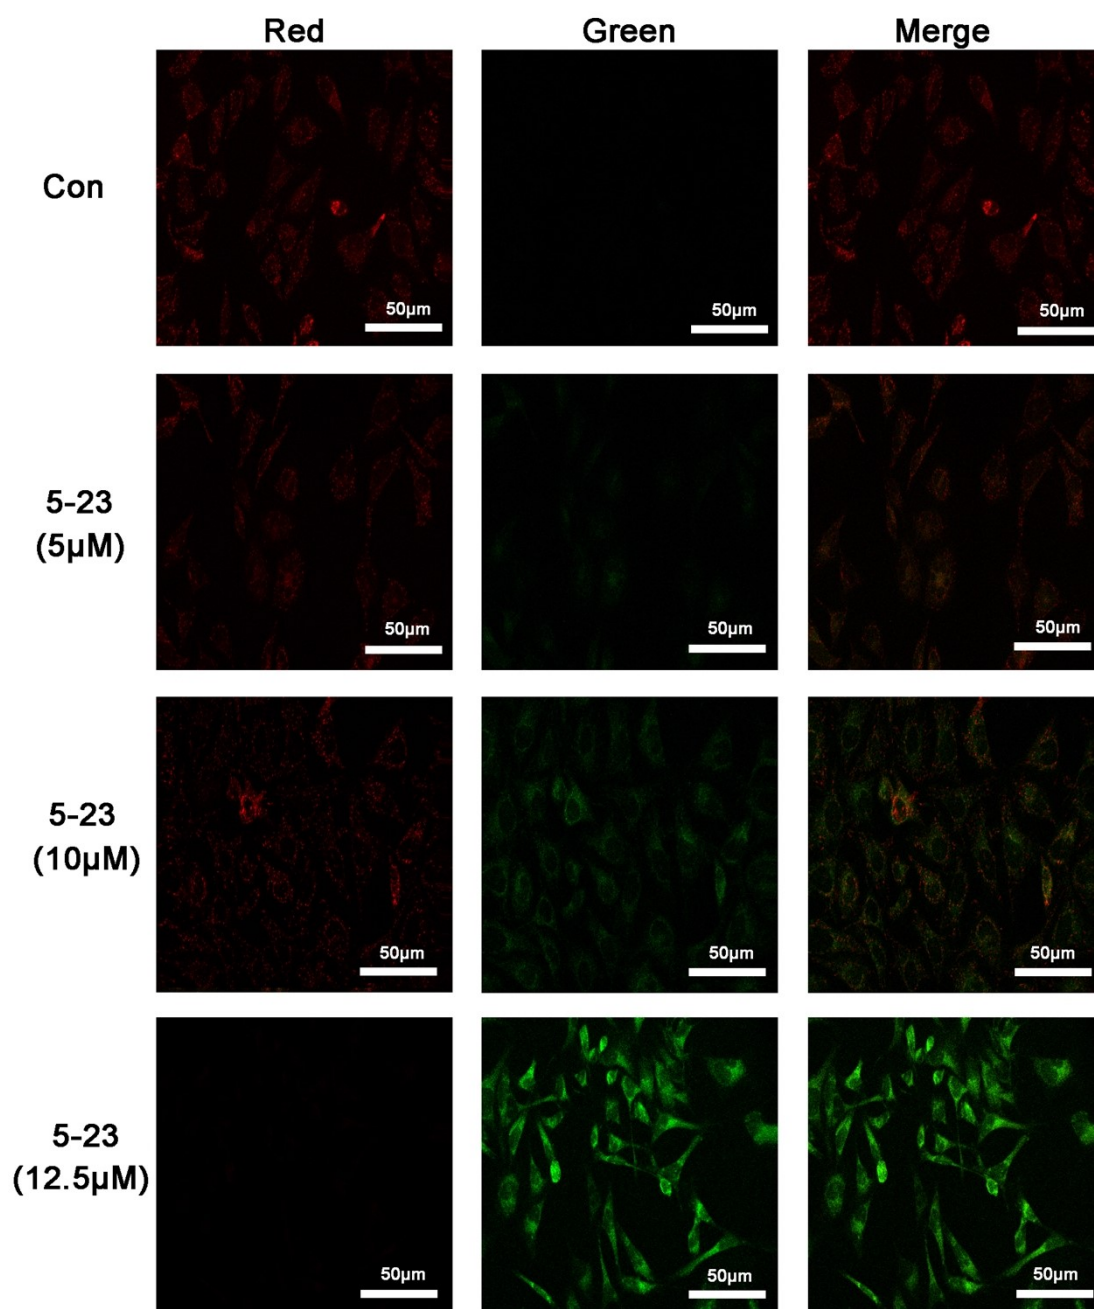

**Fig. S6** Compound **5-23** induced loss of mitochondrial membrane potential ( $\Delta\Psi_m$ ). T24 cells were treated with **5-23** for 16 h, harvested, stained with JC-1, and then  $\Delta\Psi_m$  was monitored.

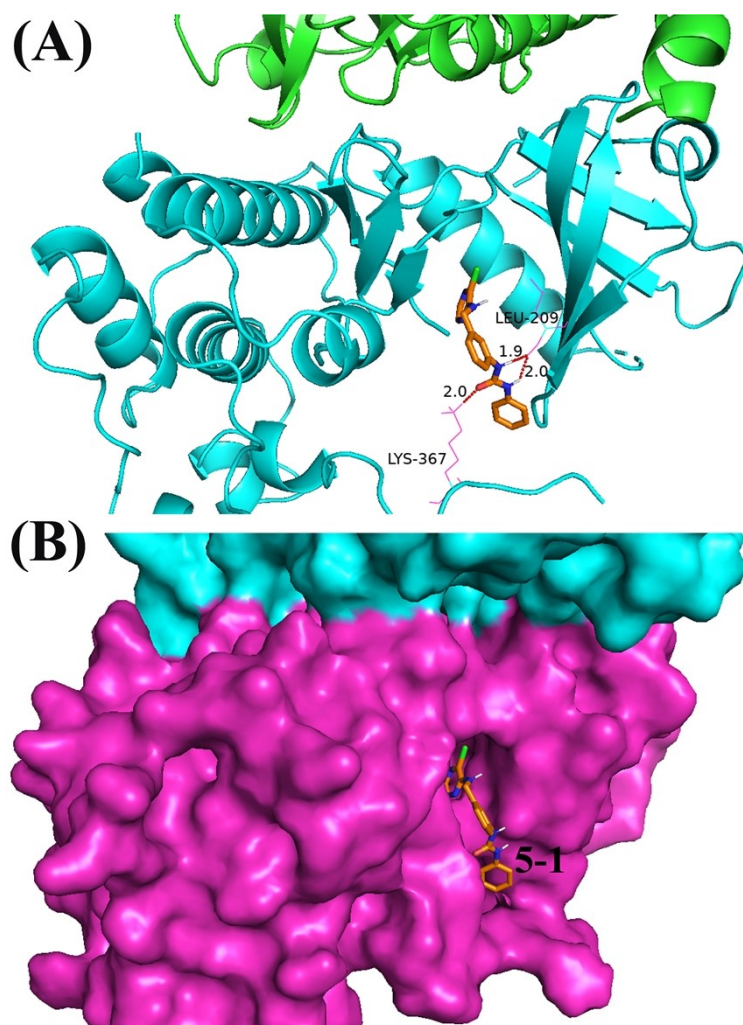

**Fig. S7** Binding model of the ligand **5-1** with the receptor MLKL (PDB ID: 6O5Z). (A) Docked conformation of **5-1** when interacted with MLKL. Ligand and key residues are represented as stick models and colored by atom type, whereas the proteins are represented as cartoons. (B) Compound **5-1** embedded in the binding pocket of MLKL. Hydrogen bonds are represented by red dotted lines. For the ligand, white: hydrogen atom; red: oxygen atom; dark blue: nitrogen atom; green: chlorine atom; orange: the backbone and the carbon atoms of **5-1**.

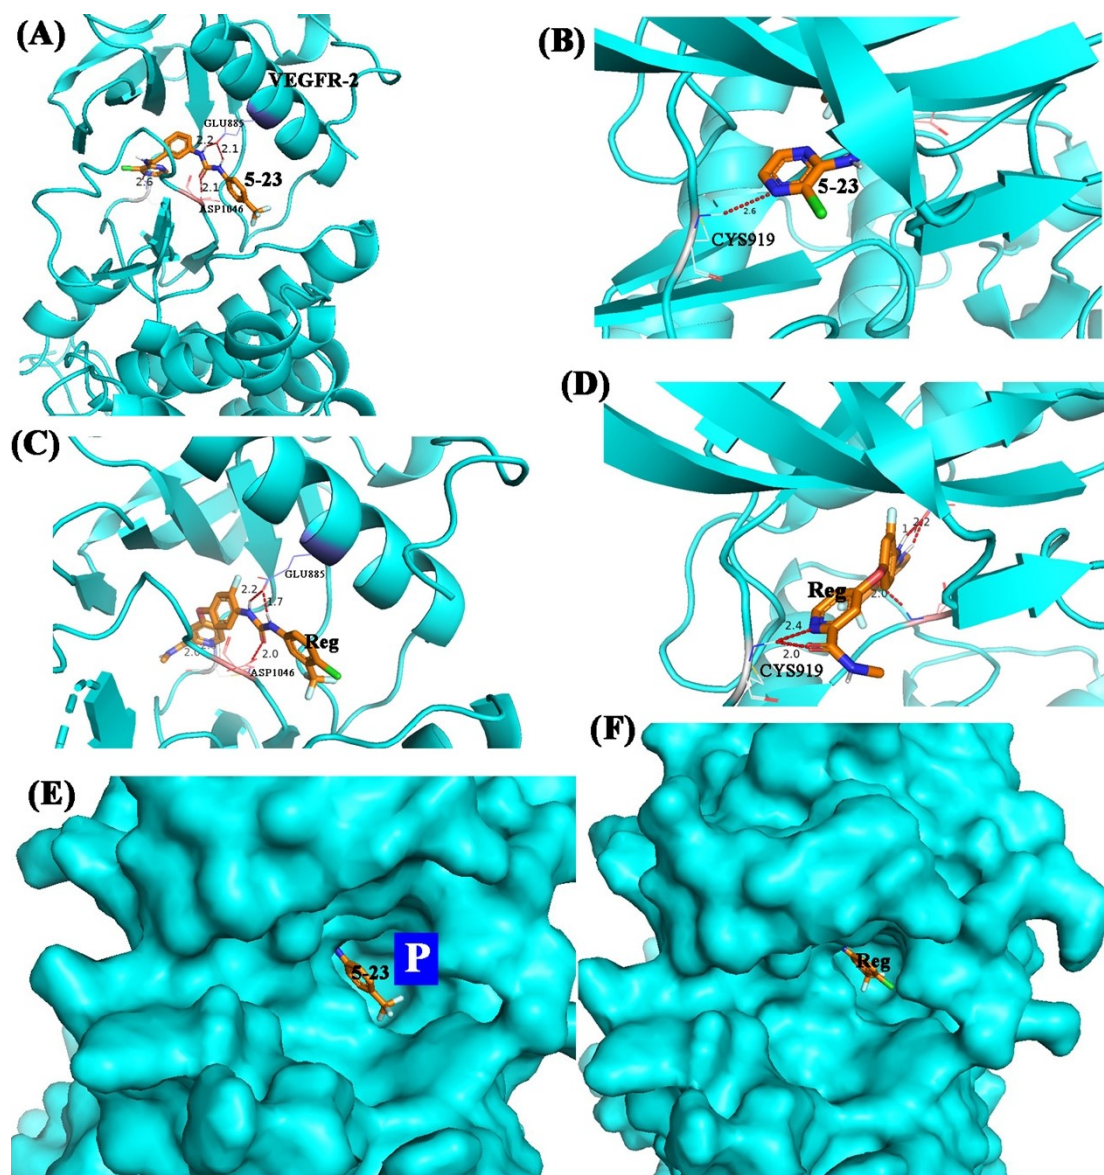

**Fig. S8** Binding model of the ligand **5-23** (or **Reg**) in complex with the receptor VEGFR-2 (PDB ID: 3WZE). Docked conformations of **5-23** (A, B) and **Reg** (C, D) when interacted with VEGFR-2. Compound **5-23** (E) and **Reg** (F) embedded in the binding pocket "P" of VEGFR-2.

## Table S1–S2

**Table S1** Antiproliferative activities of synthesized pyrazinyl-aryl urea derivatives (**5-1–5-28**) against NCI-H460 and PC-3 cell lines *in vitro*

| Compd.      | R                             | 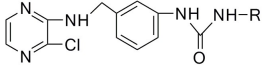 |              |
|-------------|-------------------------------|------------------------------------------------------------------------------------|--------------|
|             |                               | IC <sub>50</sub> (μM) <sup>a, b</sup>                                              |              |
|             |                               | NCI-H460                                                                           | PC-3         |
| <b>5-1</b>  | phenyl                        | 10.62 ± 0.49                                                                       | 38.03 ± 1.71 |
| <b>5-2</b>  | 2-methylphenyl                | 6.43 ± 0.39                                                                        | 28.79 ± 1.84 |
| <b>5-3</b>  | 3-methylphenyl                | 5.18 ± 0.42                                                                        | 31.29 ± 2.02 |
| <b>5-4</b>  | 4-methylphenyl                | 8.19 ± 0.44                                                                        | 29.13 ± 1.77 |
| <b>5-5</b>  | 2,4-dimethylphenyl            | 9.82 ± 0.44                                                                        | 26.16 ± 1.39 |
| <b>5-6</b>  | 3,4-dimethylphenyl            | 8.79 ± 0.29                                                                        | 21.37 ± 1.05 |
| <b>5-7</b>  | 2-ethylphenyl                 | 6.59 ± 0.42                                                                        | 17.11 ± 0.62 |
| <b>5-8</b>  | 2,6-diethylphenyl             | 11.36 ± 0.74                                                                       | 10.19 ± 0.55 |
| <b>5-9</b>  | 4-( <i>tert</i> -butyl)phenyl | 5.73 ± 0.37                                                                        | 18.39 ± 0.97 |
| <b>5-10</b> | 2-methoxyphenyl               | 6.60 ± 0.35                                                                        | 34.13 ± 1.59 |
| <b>5-11</b> | 4-methoxyphenyl               | 8.97 ± 0.92                                                                        | 22.61 ± 1.94 |
| <b>5-12</b> | 4-ethoxyphenyl                | 6.02 ± 0.38                                                                        | 24.03 ± 1.63 |
| <b>5-13</b> | 2-fluorophenyl                | 9.81 ± 0.48                                                                        | 13.17 ± 0.52 |
| <b>5-14</b> | 2-chlorophenyl                | 7.42 ± 0.31                                                                        | 10.13 ± 0.89 |
| <b>5-15</b> | 3-chlorophenyl                | 7.63 ± 0.49                                                                        | 9.41 ± 0.61  |
| <b>5-16</b> | 4-chlorophenyl                | 5.97 ± 0.35                                                                        | 16.12 ± 0.78 |
| <b>5-17</b> | 3-chloro-4-fluorophenyl       | 5.47 ± 0.43                                                                        | 9.03 ± 0.48  |
| <b>5-18</b> | 2,4-dichlorophenyl            | 6.95 ± 0.48                                                                        | 6.92 ± 0.51  |
| <b>5-19</b> | 3,4-dichlorophenyl            | 5.73 ± 0.56                                                                        | 8.23 ± 0.39  |
| <b>5-20</b> | 3-chloro-4-methylphenyl       | 12.77 ± 0.87                                                                       | 12.33 ± 0.61 |
| <b>5-21</b> | 2-bromo-4-chlorophenyl        | 9.34 ± 0.99                                                                        | 11.16 ± 0.77 |

| (Continue)  |                                      |                   |              |
|-------------|--------------------------------------|-------------------|--------------|
| <b>5-22</b> | 3-trifluoromethylphenyl              | 5.83 ± 0.41       | 5.43 ± 0.39  |
| <b>5-23</b> | 4-trifluoromethylphenyl              | 5.71 ± 0.36       | 4.71 ± 0.29  |
| <b>5-24</b> | 4-( <i>N,N</i> -dimethylamino)phenyl | 16.39 ± 0.74      | > 40         |
| <b>5-25</b> | 4-methylsulfonylphenyl               | 12.67 ± 0.73      | > 40         |
| <b>5-26</b> | $\alpha$ -naphthyl                   | 28.46 ± 1.22      | 36.19 ± 2.03 |
| <b>5-27</b> | cyclopentyl                          | > 40              | > 40         |
| <b>5-28</b> | cyclohexyl                           | > 40              | > 40         |
| <b>Reg</b>  | —                                    | 13.75 ± 0.71      | 15.23 ± 0.86 |
| <b>Gem</b>  | —                                    | N.D. <sup>c</sup> | 34.13 ± 1.76 |

<sup>a</sup> Proliferation inhibitory activity was assessed using the MTT assay in cancer cell lines (NCI-H460, PC-3) treated with different concentrations of target compounds and positive reference drugs (regorafenib and gemcitabine) for 48 h, respectively. Data shown are means ± S.D. of four independent experiments.

<sup>b</sup> Compounds with IC<sub>50</sub> values > 40  $\mu$ M are considered to be inactive.

<sup>c</sup> N.D. = not determined.

**Table S2** Quantitative apoptosis assay of T24 cells treated with compound **5-23** using Annex-V/PI dual staining method <sup>a</sup>

| Group              | Conc.<br>( $\mu$ M) <sup>b</sup> | Viable cells<br>(Q1, %) | Early apoptotic<br>cells (Q2, %) | Late apoptotic<br>cells (Q3, %) | Necrotic cells<br>(Q4, %) | Apoptotic cells<br>(Q2 + Q3, %) |
|--------------------|----------------------------------|-------------------------|----------------------------------|---------------------------------|---------------------------|---------------------------------|
| Control            | 0                                | 95.78 $\pm$ 2.33        | 1.66 $\pm$ 0.19                  | 1.58 $\pm$ 0.38                 | 0.98 $\pm$ 0.16           | 3.24 $\pm$ 0.31                 |
| Reg                | 7.5                              | 77.22 $\pm$ 3.03        | 5.84 $\pm$ 0.66                  | 12.74 $\pm$ 1.36                | 4.20 $\pm$ 0.53           | 18.58 $\pm$ 1.22                |
| Gem                | 7.5                              | 81.43 $\pm$ 2.73        | 2.14 $\pm$ 0.27                  | 11.37 $\pm$ 0.91                | 5.06 $\pm$ 0.59           | 13.51 $\pm$ 0.82                |
| <b>5-23</b>        | 2.5                              | 88.35 $\pm$ 2.26        | 6.02 $\pm$ 0.82                  | 2.99 $\pm$ 0.39                 | 2.64 $\pm$ 0.29           | 9.01 $\pm$ 0.74                 |
| <b>5-23</b>        | 5                                | 82.51 $\pm$ 3.47        | 11.54 $\pm$ 1.49                 | 3.29 $\pm$ 0.38                 | 2.66 $\pm$ 0.47           | 14.83 $\pm$ 1.26                |
| <b>5-23</b>        | 7.5                              | 72.62 $\pm$ 3.25        | 5.68 $\pm$ 0.76                  | 15.73 $\pm$ 1.67                | 5.97 $\pm$ 0.65           | 21.41 $\pm$ 1.39                |
| Reg + zVAD         | 7.5                              | 88.92 $\pm$ 1.97        | 1.92 $\pm$ 0.31                  | 5.89 $\pm$ 0.74                 | 3.27 $\pm$ 0.42           | 7.81 $\pm$ 0.68**               |
| Gem + zVAD         | 7.5                              | 91.12 $\pm$ 2.86        | 2.57 $\pm$ 0.26                  | 3.59 $\pm$ 0.43                 | 2.72 $\pm$ 0.41           | 6.16 $\pm$ 0.36**               |
| <b>5-23</b> + zVAD | 2.5                              | 92.84 $\pm$ 1.71        | 2.11 $\pm$ 0.31                  | 2.74 $\pm$ 0.39                 | 2.31 $\pm$ 0.25           | 4.85 $\pm$ 0.36*                |
| <b>5-23</b> + zVAD | 5                                | 90.01 $\pm$ 2.42        | 2.07 $\pm$ 0.48                  | 5.03 $\pm$ 0.79                 | 2.89 $\pm$ 0.48           | 7.10 $\pm$ 0.74*                |
| <b>5-23</b> + zVAD | 7.5                              | 87.83 $\pm$ 2.89        | 7.05 $\pm$ 0.98                  | 3.46 $\pm$ 0.54                 | 1.66 $\pm$ 0.23           | 10.51 $\pm$ 0.88**              |

<sup>a</sup> T24 cells were incubated with compound **5-23** (or positive reference drugs) for 10 h in the presence (or absence) of a pan-caspase inhibitor zVAD (30  $\mu$ M). The percentage of viable, early apoptotic, late apoptotic, and necrotic cells are presented as mean  $\pm$  S.D. ( $n = 3$ ).

<sup>b</sup> Here Conc. refers to the concentration of compound **5-23** or positive reference drugs.

\*  $p < 0.05$  and \*\*  $p < 0.01$  versus the groups in which only the same concentration of compound **5-23** (or positive reference drugs) was added.
